# Supplementary material for: The effect of exercise and nutrition interventions on physical functioning in patients undergoing haematopoietic stem cell transplantation: a systematic review and meta-analysis
Source: PubMed Central journal article supplement (PMC8464580; doi:10.1007/s00520-021-06334-2), 2021-06-16

| Study or Subgroup                                                                                       | Exercise intervention |            | Usual care |            | Weight        | Risk Ratio               |                     |
|---------------------------------------------------------------------------------------------------------|-----------------------|------------|------------|------------|---------------|--------------------------|---------------------|
|                                                                                                         | Events                | Total      | Events     | Total      |               | M-H, Random, 95% CI      | M-H, Random, 95% CI |
| Baumann 2010                                                                                            | 8                     | 32         | 7          | 32         | 25.6%         | 1.14 [0.47, 2.78]        |                     |
| Hacker 2011                                                                                             | 1                     | 9          | 1          | 10         | 2.9%          | 1.11 [0.08, 15.28]       |                     |
| Pahl 2020                                                                                               | 9                     | 37         | 7          | 34         | 26.6%         | 1.18 [0.49, 2.82]        |                     |
| Santa Mina 2020                                                                                         | 1                     | 15         | 3          | 15         | 4.4%          | 0.33 [0.04, 2.85]        |                     |
| Wiskemann 2011                                                                                          | 11                    | 52         | 13         | 53         | 40.5%         | 0.86 [0.43, 1.75]        |                     |
| <b>Total (95% CI)</b>                                                                                   |                       | <b>145</b> |            | <b>144</b> | <b>100.0%</b> | <b>0.97 [0.62, 1.53]</b> |                     |
| Total events                                                                                            | 30                    |            | 31         |            |               |                          |                     |
| Heterogeneity: Tau <sup>2</sup> = 0.00; Chi <sup>2</sup> = 1.40, df = 4 (P = 0.84); I <sup>2</sup> = 0% |                       |            |            |            |               |                          |                     |
| Test for overall effect: Z = 0.12 (P = 0.91)                                                            |                       |            |            |            |               |                          |                     |

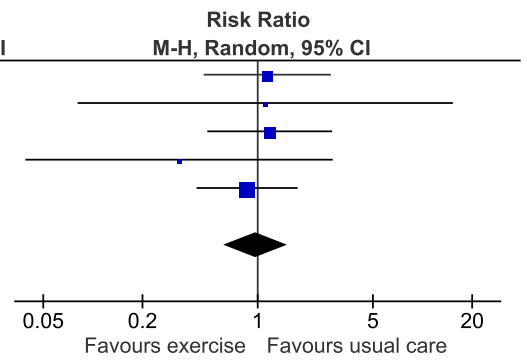

Supplement: 520_2021_6334_MOESM18_ESM.pdf [file 520_2021_6334_MOESM18_ESM.pdf]
