# Supplementary material for: The effect of exercise and nutrition interventions on physical functioning in patients undergoing haematopoietic stem cell transplantation: a systematic review and meta-analysis
Source: PubMed Central journal article supplement (PMC8464580; doi:10.1007/s00520-021-06334-2), 2021-06-16

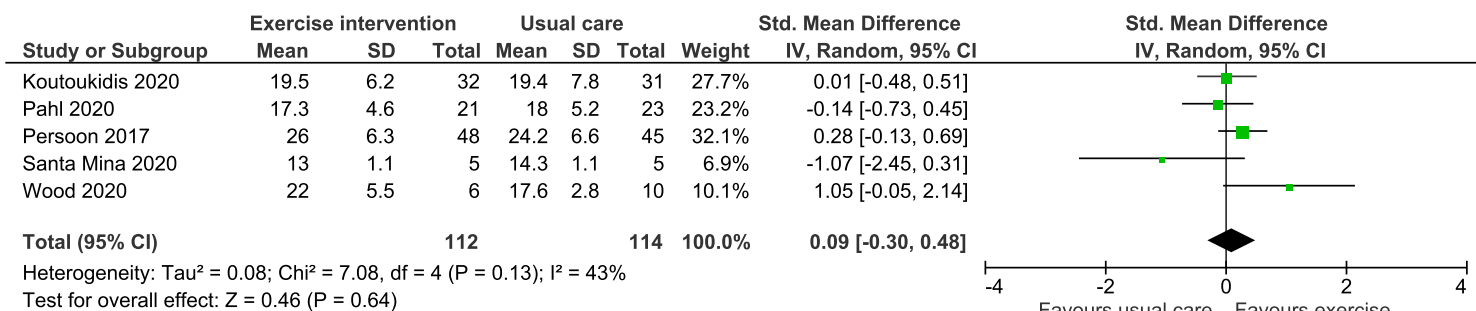

Supplement: 520_2021_6334_MOESM3_ESM.pdf [file 520_2021_6334_MOESM3_ESM.pdf]
