# Supplementary material for: The effect of exercise and nutrition interventions on physical functioning in patients undergoing haematopoietic stem cell transplantation: a systematic review and meta-analysis
Source: PubMed Central journal article supplement (PMC8464580; doi:10.1007/s00520-021-06334-2), 2021-06-16

| Study or Subgroup     | Exercise intervention |       |            | Usual care |       |            | Weight        | Std. Mean Difference      |                    | Std. Mean Difference<br>IV, Random, 95% CI |
|-----------------------|-----------------------|-------|------------|------------|-------|------------|---------------|---------------------------|--------------------|--------------------------------------------|
|                       | Mean                  | SD    | Total      | Mean       | SD    | Total      |               | IV, Random, 95% CI        | IV, Random, 95% CI |                                            |
| Hacker 2011           | 34.8                  | 11    | 8          | 29         | 8.7   | 9          | 8.5%          | 0.56 [-0.42, 1.54]        |                    |                                            |
| Hacker 2017           | 31.12                 | 10.26 | 33         | 27.54      | 11.07 | 34         | 19.7%         | 0.33 [-0.15, 0.81]        |                    |                                            |
| Knols 2011            | 36.5                  | 10.9  | 57         | 34.4       | 9.5   | 57         | 24.0%         | 0.20 [-0.16, 0.57]        |                    |                                            |
| Koutoukidis 2020      | 30.1                  | 10    | 34         | 34         | 9     | 34         | 19.8%         | -0.41 [-0.89, 0.08]       |                    |                                            |
| Persoon 2017          | 40.9                  | 12    | 48         | 41.3       | 11.7  | 45         | 22.5%         | -0.03 [-0.44, 0.37]       |                    |                                            |
| Santa Mina 2020       | 64.3                  | 7     | 6          | 53.8       | 7.1   | 7          | 5.6%          | 1.38 [0.12, 2.65]         |                    |                                            |
| <b>Total (95% CI)</b> |                       |       | <b>186</b> |            |       | <b>186</b> | <b>100.0%</b> | <b>0.15 [-0.18, 0.48]</b> |                    |                                            |

Heterogeneity: Tau<sup>2</sup> = 0.08; Chi<sup>2</sup> = 10.67, df = 5 (P = 0.06); I<sup>2</sup> = 53%  
 Test for overall effect: Z = 0.91 (P = 0.36)

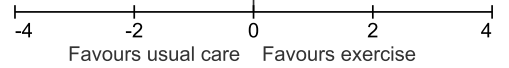

Supplement: 520_2021_6334_MOESM4_ESM.pdf [file 520_2021_6334_MOESM4_ESM.pdf]
